# Supplementary material
Source: PubMed Central journal article supplement (PMC9892527)
Supplement: sj-pdf-1-psw-10.1177_14789299211056193.pdf [file sj-pdf-1-psw-10.1177_14789299211056193.pdf]

## ONLINE APPENDIX

Table A1. Relative distributions of the dependent and independent variables

| Variables                                |                                                              | February  | March     | April     | May       | June      | July      |
|------------------------------------------|--------------------------------------------------------------|-----------|-----------|-----------|-----------|-----------|-----------|
| Trust in the prime minister              | No trust at all                                              | 33,2      | 31,3      | 28,4      | 29,3      | 32,2      | 32,6      |
|                                          | Little trust                                                 | 35,1      | 39,5      | 32,2      | 33,8      | 31,7      | 34,0      |
|                                          | Some trust                                                   | 26,5      | 24,8      | 32,0      | 31,1      | 29,4      | 26,4      |
|                                          | A lot of trust                                               | 5,2       | 4,4       | 7,5       | 5,8       | 6,7       | 7,0       |
| Sociotropic economic evaluation          | Very bad                                                     | 15.0      | 11.6      | 6.0       | 16.5      | 26.2      | 24.7      |
|                                          | Bad                                                          | 31.3      | 29.5      | 26.6      | 40.3      | 51.5      | 50.4      |
|                                          | (not asked)                                                  | 46.8      | 50.4      | 11.9      | 9.7       | 9.1       | 9.2       |
|                                          | Good                                                         | 6.5       | 8.2       | 53.5      | 32.3      | 12.8      | 15.2      |
|                                          | Very good                                                    | 0.4       | 0.3       | 2.0       | 1.1       | 0.4       | 0.5       |
| Egotropic economic evaluation            | Very bad                                                     | 3.7       | 3.5       | 3.8       | 4.7       | 4.4       | 6.2       |
|                                          | Bad                                                          | 13.0      | 12.0      | 15.8      | 14.4      | 17.1      | 15.8      |
|                                          | (not asked)                                                  | 47.2      | 48.8      | 10.3      | 11.7      | 14.3      | 14.2      |
|                                          | Good                                                         | 35.0      | 34.9      | 66.0      | 65.5      | 60.1      | 60.7      |
|                                          | Very good                                                    | 1.1       | 0.8       | 4.0       | 3.6       | 4.0       | 3.1       |
| Measures to fight the pandemic           | Not necessary at all                                         | -         | -         | 0.5       | 1.0       | 1.3       | 1.5       |
|                                          | Little necessary                                             | -         | -         | 1.6       | 2.5       | 6.1       | 8.1       |
|                                          | (not asked)                                                  | -         | -         | 0.1       | 0.4       | 2.0       | 1.2       |
|                                          | Necessary                                                    | -         | -         | 24.8      | 36.0      | 33.6      | 34.1      |
|                                          | Very necessary                                               | -         | -         | 73.0      | 60.1      | 57.0      | 55.1      |
| Health hazard due to Covid-19 – national | Covid-19 is the main national problem                        | -         | -         | 44.7      | 23.9      | 13.9      | 17.2      |
| Health hazard due to Covid-19 – personal | Covid-19 is the problem that affects the respondent the most | -         | -         | 41.3      | 26.0      | 26.2      | 24.1      |
| Concern about Covid-19                   | Not at all                                                   | -         | -         | 0.4       | 0.6       | 0.9       | 0.9       |
|                                          | A little                                                     | -         | -         | 2.6       | 0.4       | 0.8       | 0.5       |
|                                          | (not asked)                                                  | -         | -         | 1.2       | 2.0       | 4.0       | 3.4       |
|                                          | Somewhat                                                     | -         | -         | 37.0      | 37.0      | 42.1      | 46.7      |
|                                          | Very much                                                    | -         | -         | 58.9      | 60.0      | 52.3      | 48.5      |
| Party vote                               | PSOE                                                         | 36.7      | 34.9      | 35.4      | 35.4      | 35.9      | 37.9      |
|                                          | PP                                                           | 18.9      | 15.7      | 17.9      | 16.9      | 16.2      | 16.8      |
| Left-right placement                     | Left-wingers (2)                                             | 71.0      | 74.3      | 72.4      | 73.6      | 77.5      | 76.0      |
|                                          | Right-wingers (1)                                            | 29.0      | 25.7      | 27.6      | 26.4      | 22.5      | 24.0      |
| N                                        |                                                              | 2173-2946 | 2812-3889 | 2798-3798 | 2798-3798 | 2931-4252 | 2126-3023 |

Sources: CIS, Centro de Investigaciones Sociológicas, Barometers February to April 2020 (at: [http://www.cis.es/cis/open/cm/ES/11\\_barometros/index.jsp](http://www.cis.es/cis/open/cm/ES/11_barometros/index.jsp)).

Note: (1) Includes respondents who self-positioned themselves in points 6 to 10 of the scale, inclusive; (2) Includes respondents who self-positioned themselves in points 1 to 5 of the scale, inclusive.

Table A2. Explaining trust in the Spanish prime minister in February-July, and in April-July 2020 (DV: 0= don't trust; 1=trust)

|                                                   | February – July 2020 |                    |         |                    | April – July 2020 |                    |         |                    |
|---------------------------------------------------|----------------------|--------------------|---------|--------------------|-------------------|--------------------|---------|--------------------|
|                                                   | Model 1              |                    | Model 2 |                    | Model 3           |                    | Model 4 |                    |
|                                                   | Exp(B)               | B (se)             | Exp(B)  | B (se)             | Exp(B)            | B (se)             | Exp(B)  | B (se)             |
| Month dummy (March=1)                             | 1.01                 | -0.11<br>(0.05)    | 0.63    | -0.47***<br>(0.06) |                   |                    |         |                    |
| Month dummy (April=1)                             | 1.49                 | 0.40***<br>(0.06)  | 0.82    | -0.20**<br>(0.07)  |                   |                    |         |                    |
| Month dummy (May=1)                               | 1.27                 | 0.24***<br>(0.05)  | 0.88    | -0.13*<br>(0.06)   | 0.85              | -0.16**<br>(0.06)  | 1.22    | 0.20*<br>(0.08)    |
| Month dummy (June=1)                              | 1.39                 | 0.33***<br>(0.05)  | 1.31    | 0.27***<br>(0.05)  | 0.91              | -0.10<br>(0.06)    | 1.87    | 0.62***<br>(0.08)  |
| Month dummy (July=1)                              | 1.15                 | 0.14**<br>(0.06)   | 0.97    | -0.03<br>(0.06)    | 0.75              | -0.29***<br>(0.07) | 1.41    | 0.34***<br>(0.09)  |
| Sociotropic economic evaluation (very good=5)     |                      |                    | 1.75    | 0.57***<br>(0.02)  |                   |                    | 1.77    | 0.57***<br>(0.03)  |
| Egotropic economic evaluation (very good=5)       |                      |                    | 1.13    | 0.12***<br>(0.02)  |                   |                    | 1.06    | 0.06*<br>(0.03)    |
| Measures to fight the pandemic (very necessary=5) |                      |                    |         |                    |                   |                    | 1.39    | 0.33***<br>(0.04)  |
| Health hazard due to Covid-19 – national (=1)     |                      |                    |         |                    |                   |                    | 1.22    | 0.20**<br>(0.07)   |
| Health hazard due to Covid-19 – personal (=1)     |                      |                    |         |                    |                   |                    | 1.05    | 0.05<br>(0.06)     |
| Concern about Covid-19 (a lot=5)                  |                      |                    |         |                    |                   |                    | 1.04    | 0.04<br>(0.04)     |
| PSOE dummy (=1)                                   |                      |                    | 3.54    | 1.26***<br>(0.04)  |                   |                    | 2.76    | 1.02***<br>(0.06)  |
| PP dummy (=1)                                     |                      |                    | 0.27    | -1.31***<br>(0.09) |                   |                    | 0.35    | -1.07***<br>(0.11) |
| Left-right positioning (right=10)                 |                      |                    | 0.71    | -0.34***<br>(0.01) |                   |                    | 0.72    | -0.33***<br>(0.02) |
| Education (higher=6)                              |                      |                    | 0.96    | -0.04**<br>(0.01)  |                   |                    | 0.97    | -0.03<br>(0.02)    |
| Age                                               |                      |                    | 1.01    | 0.01***<br>(0.00)  |                   |                    | 1.01    | 0.01***<br>(0.00)  |
| Gender (male=1)                                   |                      |                    | 0.89    | -0.11***<br>(0.03) |                   |                    | 0.85    | -0.16**<br>(0.05)  |
| Constant                                          | 0.51                 | -0.67***<br>(0.02) | 0.22    | -1.52***<br>(0.12) | 0.75              | -0.28***<br>(0.05) | 0.05    | -3.03***<br>(0.33) |
| Nagelkerke                                        |                      | 0.01               |         | 0.38               |                   | 0.00               |         | 0.37               |
| N                                                 |                      |                    |         | 21426              |                   |                    |         | 8325               |

Sources: CIS. Centro de Investigaciones Sociológicas. Barometers February to July 2020 (at: [http://www.cis.es/cis/openem/ES/11\\_barometros/index.jsp](http://www.cis.es/cis/openem/ES/11_barometros/index.jsp)).

Note: Models estimate logistic regression (standard errors in parentheses). \*\*\* p<.001; \*\*p<0.01; \*p<0.05.

Table A3. Explaining trust in the Spanish prime minister during the early months of the Covid-19 pandemic (DV: 1= no trust at all; 2=little trust; 3= some trust; 4= lot of trust)

|                                                   | February |                    | March  |                    | April  |                    | May    |                    | June   |                   | July   |                    |      |                   |        |                    |      |                   |        |                    |
|---------------------------------------------------|----------|--------------------|--------|--------------------|--------|--------------------|--------|--------------------|--------|-------------------|--------|--------------------|------|-------------------|--------|--------------------|------|-------------------|--------|--------------------|
|                                                   | Exp(B)   | B (se)             | Exp(B) | B (se)             | Exp(B) | B (se)             | Exp(B) | B (se)             | Exp(B) | B (se)            | Exp(B) | B (se)             |      |                   |        |                    |      |                   |        |                    |
| Sociotropic economic evaluation (very good=5)     | 1.65     | 0.50***<br>(0.06)  | 1.85   | 0.62***<br>(0.06)  |        |                    | 1.64   | 0.50***<br>(0.05)  |        |                   | 1.74   | 0.55***<br>(0.04)  |      |                   | 1.79   | 0.58***<br>(0.05)  |      |                   | 1.87   | 0.63***<br>(0.06)  |
| Egotropic economic evaluation (very good=5)       | 1.02     | 0.02<br>(0.06)     | 1.04   | 0.04<br>(0.06)     |        |                    | 1.13   | 0.12*<br>(0.05)    |        |                   | 1.07   | 0.06<br>(0.14)     |      |                   | 1.05   | 0.05<br>(0.05)     |      |                   | 0.99   | -0.02<br>(0.05)    |
| Measures to fight the pandemic (very necessary=5) |          |                    |        |                    |        |                    | 1.45   | 0.37***<br>(0.09)  |        |                   | 1.26   | 0.23***<br>(0.06)  |      |                   | 1.39   | 0.33***<br>(0.05)  |      |                   | 1.39   | 0.33***<br>(0.06)  |
| Health hazard due to Covid-19 – national (=1)     |          |                    |        |                    | 1.71   | 0.54***<br>(0.09)  | 1.46   | 0.38***<br>(0.10)  | 1.39   | 0.33***<br>(0.08) | 1.11   | 0.11<br>(0.09)     | 1.39 | 0.33**<br>(0.11)  | 1.32   | 0.28<br>(0.12)     | 1.47 | 0.38***<br>(0.12) | 1.50   | 0.41**<br>(0.13)   |
| Health hazard due to Covid-19 – personal (=1)     |          |                    |        |                    | 0.99   | -0.01<br>(0.09)    | 1.04   | 0.03<br>(0.10)     | 1.02   | 0.02<br>(0.31)    | 1.00   | -0.01<br>(0.09)    | 1.30 | 0.26**<br>(0.08)  | 1.11   | 0.10<br>(0.09)     | 1.16 | 0.15<br>(0.11)    | 1.15   | 0.14               |
| Concern about Covid-19 (a lot=5)                  |          |                    |        |                    | 0.81   | -0.21***<br>(0.06) | 0.83   | -0.19**<br>(0.07)  | 1.00   | 0.00<br>(0.05)    | 1.02   | 0.02<br>(0.07)     | 0.84 | -0.17**<br>(0.06) | 0.89   | -0.12<br>(0.07)    | 0.92 | -0.09<br>(0.07)   | 0.96   | -0.04<br>(0.08)    |
| PSOE dummy (=1)                                   | 6.90     | 1.93***<br>(0.11)  | 7.18   | 1.97***<br>(0.10)  |        |                    | 4.09   | 1.41***<br>(0.11)  |        |                   | 1.73   | 0.55***<br>(0.09)  |      |                   | 3.01   | 1.10***<br>(0.09)  |      |                   | 4.47   | 1.50***<br>(0.12)  |
| PP dummy (=1)                                     | 0.40     | -0.91***<br>(0.16) | 0.44   | -0.82***<br>(0.14) |        |                    | 0.36   | -1.03***<br>(0.15) |        |                   | 0.64   | -0.44***<br>(0.13) |      |                   | 0.27   | -1.31***<br>(0.15) |      |                   | 0.37   | -1.00***<br>(0.18) |
| Left-right positioning (right=10)                 | 0.60     | -0.50***<br>(0.03) | 0.70   | -0.36***<br>(0.02) |        |                    | 0.68   | -0.39***<br>(0.03) |        |                   | 0.83   | -0.19***<br>(0.02) |      |                   | 0.67   | -0.41***<br>(0.03) |      |                   | 0.63   | -0.47***<br>(0.03) |
| Education (higher=6)                              | 0.88     | -0.12***<br>(0.03) | 0.93   | -0.08**<br>(0.03)  |        |                    | 0.88   | -0.12***<br>(0.04) |        |                   | 0.95   | -0.06<br>(0.03)    |      |                   | 0.94   | -0.07*<br>(0.03)   |      |                   | 0.96   | -0.04<br>(0.04)    |
| Age                                               | 1.01     | 0.01***<br>(0.00)  | 1.01   | 0.01**<br>(0.00)   |        |                    | 1.01   | 0.01*<br>(0.00)    |        |                   | 1.01   | 0.01**<br>(0.00)   |      |                   | 1.01   | 0.01***<br>(0.00)  |      |                   | 1.01   | 0.01*<br>(0.00)    |
| Gender (male=1)                                   | 0.82     | -0.20*<br>(0.09)   | 0.91   | -0.10<br>(0.08)    |        |                    | 0.94   | -0.06<br>(0.09)    |        |                   | 0.91   | -0.10<br>(0.08)    |      |                   | 0.79   | -0.24**<br>(0.08)  |      |                   | 0.90   | -0.11<br>(0.10)    |
| AIC                                               |          | 3615.32            |        | 4866.62            |        |                    | 260.80 | 3870.86            |        |                   | 246    | 5345.26            |      |                   | 307.57 | 4775.74            |      |                   | 257.63 | 3225.40            |
| BIC                                               |          | 3676.74            |        | 4930.84            |        |                    | 296.37 | 3954.47            |        |                   | 282.53 | 5431.64            |      |                   | 344.53 | 4862.23            |      |                   | 292.44 | 3306.66            |
| N                                                 |          | 1991               |        | 2536               |        |                    | 1947   |                    |        |                   | 2341   |                    |      | 2359              |        |                    |      |                   | 1665   |                    |

Sources: CIS. Centro de Investigaciones Sociológicas. Barometers February to April 2020 (at: [http://www.cis.es/cis/openm/ES/11\\_barometros/index.jsp](http://www.cis.es/cis/openm/ES/11_barometros/index.jsp)).

Note: Models estimate ordinal logistic regression (standard errors in parentheses). \*\*\* p<.001; \*\*p<.01; \*p<.05.
